# Supplementary material for: Positive family history of colorectal cancer in a general practice setting [FRIDA.Frankfurt]: study protocol of a of a cross-sectional study
Source: Springer Nature journal article supplement (doi:10.1186/s12885-015-1600-7), 2015-08-27
Supplement: MOESM1 [file 12885_2015_1600_MOESM1_ESM.pdf]

Please ask every patient on the list the following four questions:

Question 1: A **first-degree relative** of mine (parents, siblings, children) developed bowel cancer.

Question 2: A **first-degree relative** of mine (parents, siblings, children) who developed bowel cancer was **under 50 years of age**.

Question 3 A **bowel polyp** (adenoma) was discovered in a **first-degree relative** of mine (parents, siblings, children) before his or her 50th birthday.

Question 4 **Three or more relatives** of mine developed bowel cancer, stomach cancer, uterine cancer, ovarian cancer, ureteral cancer or cancer of the renal pelvis.

.....

|                                 |                       |                                                                                   |                                                                                                                                                                                                                                                                                                                                                                                                                                                             |                                                                                     |                                                                                                                                                                                                                                                                                                                                                                |                                                                                     |                                                                                                                                                                                                                                                                       |                                                                                                                                       |  |
|---------------------------------|-----------------------|-----------------------------------------------------------------------------------|-------------------------------------------------------------------------------------------------------------------------------------------------------------------------------------------------------------------------------------------------------------------------------------------------------------------------------------------------------------------------------------------------------------------------------------------------------------|-------------------------------------------------------------------------------------|----------------------------------------------------------------------------------------------------------------------------------------------------------------------------------------------------------------------------------------------------------------------------------------------------------------------------------------------------------------|-------------------------------------------------------------------------------------|-----------------------------------------------------------------------------------------------------------------------------------------------------------------------------------------------------------------------------------------------------------------------|---------------------------------------------------------------------------------------------------------------------------------------|--|
| Patient-ID                      |                       |  | <b>Were you able to ask the patient the four questions about hereditary risk?</b><br><input type="checkbox"/> Yes, in the practice<br><input type="checkbox"/> Yes, on the phone<br><input type="checkbox"/> No, no interest<br><input type="checkbox"/> Knows about hereditary risk (please ask questions and invite patient anyway)<br><input type="checkbox"/> No, couldn't reach patient after 3 attempts<br><input type="checkbox"/> No, because _____ |  | <b>The answers to the 4 questions:</b><br>Question 1: <input type="checkbox"/> No <input type="checkbox"/> Yes → → →<br>Question 2: <input type="checkbox"/> No <input type="checkbox"/> Yes → → →<br>Question 3: <input type="checkbox"/> No <input type="checkbox"/> Yes → → →<br>Question 4: <input type="checkbox"/> No <input type="checkbox"/> Yes → → → |  | <b>Arranged consultation?</b><br><input type="checkbox"/> Yes, forwarded patient directly to doctor<br><input type="checkbox"/> Yes, arranged consultation<br><input type="checkbox"/> Patient desires further contact<br><input type="checkbox"/> No, because: _____ |                                                                                                                                       |  |
| Patient's date of birth:        |                       |                                                                                   |                                                                                                                                                                                                                                                                                                                                                                                                                                                             |                                                                                     |                                                                                                                                                                                                                                                                                                                                                                |                                                                                     |                                                                                                                                                                                                                                                                       | <b>Did the consultation with the doctor take place?</b><br><input type="checkbox"/> Yes<br><input type="checkbox"/> No, because _____ |  |
| Gender:                         | Date:                 |                                                                                   |                                                                                                                                                                                                                                                                                                                                                                                                                                                             |                                                                                     |                                                                                                                                                                                                                                                                                                                                                                |                                                                                     |                                                                                                                                                                                                                                                                       |                                                                                                                                       |  |
| <input type="checkbox"/> female | _____ . _____ . _____ |                                                                                   |                                                                                                                                                                                                                                                                                                                                                                                                                                                             |                                                                                     |                                                                                                                                                                                                                                                                                                                                                                |                                                                                     |                                                                                                                                                                                                                                                                       |                                                                                                                                       |  |
| <input type="checkbox"/> male   | _____ . _____ . _____ |                                                                                   |                                                                                                                                                                                                                                                                                                                                                                                                                                                             |                                                                                     |                                                                                                                                                                                                                                                                                                                                                                |                                                                                     |                                                                                                                                                                                                                                                                       |                                                                                                                                       |  |

  

|                                 |                       |                                                                                   |                                                                                                                                                                                                                                                                                                                                                                                                                                                             |                                                                                     |                                                                                                                                                                                                                                                                                                                                                                |                                                                                     |                                                                                                                                                                                                                                                                       |                                                                                                                                       |  |
|---------------------------------|-----------------------|-----------------------------------------------------------------------------------|-------------------------------------------------------------------------------------------------------------------------------------------------------------------------------------------------------------------------------------------------------------------------------------------------------------------------------------------------------------------------------------------------------------------------------------------------------------|-------------------------------------------------------------------------------------|----------------------------------------------------------------------------------------------------------------------------------------------------------------------------------------------------------------------------------------------------------------------------------------------------------------------------------------------------------------|-------------------------------------------------------------------------------------|-----------------------------------------------------------------------------------------------------------------------------------------------------------------------------------------------------------------------------------------------------------------------|---------------------------------------------------------------------------------------------------------------------------------------|--|
| Patient-ID                      |                       |  | <b>Were you able to ask the patient the four questions about hereditary risk?</b><br><input type="checkbox"/> Yes, in the practice<br><input type="checkbox"/> Yes, on the phone<br><input type="checkbox"/> No, no interest<br><input type="checkbox"/> Knows about hereditary risk (please ask questions and invite patient anyway)<br><input type="checkbox"/> No, couldn't reach patient after 3 attempts<br><input type="checkbox"/> No, because _____ |  | <b>The answers to the 4 questions:</b><br>Question 1: <input type="checkbox"/> No <input type="checkbox"/> Yes → → →<br>Question 2: <input type="checkbox"/> No <input type="checkbox"/> Yes → → →<br>Question 3: <input type="checkbox"/> No <input type="checkbox"/> Yes → → →<br>Question 4: <input type="checkbox"/> No <input type="checkbox"/> Yes → → → |  | <b>Arranged consultation?</b><br><input type="checkbox"/> Yes, forwarded patient directly to doctor<br><input type="checkbox"/> Yes, arranged consultation<br><input type="checkbox"/> Patient desires further contact<br><input type="checkbox"/> No, because: _____ |                                                                                                                                       |  |
| Patient's date of birth:        |                       |                                                                                   |                                                                                                                                                                                                                                                                                                                                                                                                                                                             |                                                                                     |                                                                                                                                                                                                                                                                                                                                                                |                                                                                     |                                                                                                                                                                                                                                                                       | <b>Did the consultation with the doctor take place?</b><br><input type="checkbox"/> Yes<br><input type="checkbox"/> No, because _____ |  |
| Gender:                         | Date:                 |                                                                                   |                                                                                                                                                                                                                                                                                                                                                                                                                                                             |                                                                                     |                                                                                                                                                                                                                                                                                                                                                                |                                                                                     |                                                                                                                                                                                                                                                                       |                                                                                                                                       |  |
| <input type="checkbox"/> female | _____ . _____ . _____ |                                                                                   |                                                                                                                                                                                                                                                                                                                                                                                                                                                             |                                                                                     |                                                                                                                                                                                                                                                                                                                                                                |                                                                                     |                                                                                                                                                                                                                                                                       |                                                                                                                                       |  |
| <input type="checkbox"/> male   | _____ . _____ . _____ |                                                                                   |                                                                                                                                                                                                                                                                                                                                                                                                                                                             |                                                                                     |                                                                                                                                                                                                                                                                                                                                                                |                                                                                     |                                                                                                                                                                                                                                                                       |                                                                                                                                       |  |

.....

Design: Spiral binding,

Size: Four entries (Participants) per site, overall 250 entries, around 70 pages
