# Supplementary material for: Positive family history of colorectal cancer in a general practice setting [FRIDA.Frankfurt]: study protocol of a of a cross-sectional study
Source: Springer Nature journal article supplement (doi:10.1186/s12885-015-1600-7), 2015-08-27
Supplement: MOESM4 [file 12885_2015_1600_MOESM4_ESM.pdf]

# FR DA.Frankfurt

Familiäres Risiko für Darmkrebs

## Questionnaire 3

(only to be filled out when submitting blood and stool sample)

| This box will be filled out by the practice team |  |
|--------------------------------------------------|--|
| Date                                             |  |
| Patient-ID                                       |  |
| Barcode on labels                                |  |

Dear participant,

We are pleased that you have decided to submit a blood and stool sample. The aim of the following questionnaire is to gain further information on the risks of developing bowel cancer. It will take 10-15 minutes to fill out. Please pay attention to the following instructions:

- Please clearly tick the appropriate box. If you make a mistake, cross out the corresponding box and tick the correct one.
- **Please answer every question.** If you are in any doubt, you should tick the box which is most appropriate.
- Your answers will of course be treated in **strict confidence**. Only pseudonymized data will be used in the analysis.

If you have any questions, please do not hesitate to contact us. You will find contact details below. **Thank-you!**

**1. Has a doctor every diagnosed that you have any of the following diseases?**  
 (Please tick yes or no for every disease. If the answer is yes, how old were you when the illness was diagnosed for the first time?)

|                                                                    |                             |                                    |     |
|--------------------------------------------------------------------|-----------------------------|------------------------------------|-----|
| Heart attack                                                       | <input type="checkbox"/> No | <input type="checkbox"/> Yes, aged | _ _ |
| <hr/>                                                              |                             |                                    |     |
| Decompensated heart failure, angina pectoris                       | <input type="checkbox"/> No | <input type="checkbox"/> Yes, aged | _ _ |
| <hr/>                                                              |                             |                                    |     |
| Cardiac insufficiency, heart failure                               | <input type="checkbox"/> No | <input type="checkbox"/> Yes, aged | _ _ |
| <hr/>                                                              |                             |                                    |     |
| Stroke                                                             | <input type="checkbox"/> No | <input type="checkbox"/> Yes, aged | _ _ |
| <hr/>                                                              |                             |                                    |     |
| Impaired cerebral blood flow                                       | <input type="checkbox"/> No | <input type="checkbox"/> Yes, aged | _ _ |
| <hr/>                                                              |                             |                                    |     |
| Impaired blood circulation in the legs                             | <input type="checkbox"/> No | <input type="checkbox"/> Yes, aged | _ _ |
| <hr/>                                                              |                             |                                    |     |
| High blood pressure (hypertension)                                 | <input type="checkbox"/> No | <input type="checkbox"/> Yes, aged | _ _ |
| <hr/>                                                              |                             |                                    |     |
| Elevated blood lipids (e.g. cholesterol)                           | <input type="checkbox"/> No | <input type="checkbox"/> Yes, aged | _ _ |
| <hr/>                                                              |                             |                                    |     |
| Diabetes (Diabetes mellitus)                                       | <input type="checkbox"/> No | <input type="checkbox"/> Yes, aged | _ _ |
| <hr/>                                                              |                             |                                    |     |
| Gout                                                               | <input type="checkbox"/> No | <input type="checkbox"/> Yes, aged | _ _ |
| <hr/>                                                              |                             |                                    |     |
| Gallstones                                                         | <input type="checkbox"/> No | <input type="checkbox"/> Yes, aged | _ _ |
| <hr/>                                                              |                             |                                    |     |
| Kidney stones                                                      | <input type="checkbox"/> No | <input type="checkbox"/> Yes, aged | _ _ |
| <hr/>                                                              |                             |                                    |     |
| Stomach ulcer/<br>Duodenal ulcer (Ulcus)                           | <input type="checkbox"/> No | <input type="checkbox"/> Yes, aged | _ _ |
| <hr/>                                                              |                             |                                    |     |
| Infection with the stomach bacterium<br><i>helicobacter pylori</i> | <input type="checkbox"/> No | <input type="checkbox"/> Yes, aged | _ _ |
| <hr/>                                                              |                             |                                    |     |
| Cataracts                                                          | <input type="checkbox"/> No | <input type="checkbox"/> Yes, aged | _ _ |
| <hr/>                                                              |                             |                                    |     |
| Green star (glaucoma)                                              | <input type="checkbox"/> No | <input type="checkbox"/> Yes, aged | _ _ |
| <hr/>                                                              |                             |                                    |     |
| Asthma                                                             | <input type="checkbox"/> No | <input type="checkbox"/> Yes, aged | _ _ |
| <hr/>                                                              |                             |                                    |     |
| Hay fever                                                          | <input type="checkbox"/> No | <input type="checkbox"/> Yes, aged | _ _ |
| <hr/>                                                              |                             |                                    |     |
| Neurodermitis (atopic eczema,<br>endogenous eczema)                | <input type="checkbox"/> No | <input type="checkbox"/> Yes, aged | _ _ |
| <hr/>                                                              |                             |                                    |     |
| Femoral neck fracture                                              | <input type="checkbox"/> No | <input type="checkbox"/> Yes, aged | _ _ |
| <hr/>                                                              |                             |                                    |     |
| Depression                                                         | <input type="checkbox"/> No | <input type="checkbox"/> Yes, aged | _ _ |

**2. What medicines do you take on a regular basis?**

*(Long-term medication)*

|                            |
|----------------------------|
| e.g. Metoprolol-Ratiopharm |
|                            |
|                            |
|                            |
|                            |
|                            |
|                            |
|                            |
|                            |
|                            |

**The following question is only applicable to women (Men should jump to the next question):**

Hormone replacement therapies (e.g. estrogens) can be used to treat menopausal complaints and to prevent certain diseases (e.g. osteoporosis). Some women receive these preparations after their ovaries have been removed.

**3. Have you ever had hormone replacement therapy, as prescribed to you by a doctor? (tablets, plasters, gel, injections, cream, drops, spray etc.)**

*This question does not concern herbal supplements or homeopathic medicines*

No

Yes

If so:

For how long in all?    years

Are you taking such a product at the moment?

Yes What product? \_\_\_\_\_

No When did you last take one?      (year)

**4. Have you ever smoked regularly?**

*(daily for more than 1 year)*

No → If not, please go to question 7

Yes

If so:

Do you still smoke?

No

Yes, on average I smoke on a daily basis

|\_|\_| cigarettes      |\_|\_| cigars      |\_|\_| pipes

*(Please enter zero for the tobacco products that you do not smoke)*

**5. How old were you when you started to smoke regularly?**

|\_|\_| years of age

If you do not smoke any more:

How old were you when you stopped?      |\_|\_| years of age

**6. For how many years did you smoke regularly?**

In all around |\_|\_| years

How much did you smoke on average during this period?

|\_|\_| cigarettes      |\_|\_| cigars      |\_|\_| pipes

*(Please enter zero for the tobacco products that you do not smoke)*

**7. On how many days a week have you generally drunk alcohol over the last 12 months?**

|\_| days a week

**8. On average, how many alcoholic drinks have you drunk per week over the last 12 months?**

*(Please enter a zero for those beverages that you did not drink)*

**Beer**

**Wine / Sparkling wine**

**Spirits**

*(500 ml bottles!)*

*(250 ml glasses)*

*(20 ml glasses)*

|\_|\_|

|\_|\_|

|\_|\_|

*bottles/week*

*glasses/week*

*glasses/week*

*On average per week over the last 12 months*

**9. On average, how often have you eaten the following food products over the last 12 months?**

*(Please tick one box per product group)*

| <b>In the last 12 months</b>                                                  | <b>Several times a day</b> | <b>Once a day</b>        | <b>Several times a week</b> | <b>Once a week</b>       | <b>Less often than once a week</b> | <b>never</b>             |
|-------------------------------------------------------------------------------|----------------------------|--------------------------|-----------------------------|--------------------------|------------------------------------|--------------------------|
| Sausages and cold meat                                                        | <input type="checkbox"/>   | <input type="checkbox"/> | <input type="checkbox"/>    | <input type="checkbox"/> | <input type="checkbox"/>           | <input type="checkbox"/> |
| Poultry ( <i>not including sausages and cold meat</i> )                       | <input type="checkbox"/>   | <input type="checkbox"/> | <input type="checkbox"/>    | <input type="checkbox"/> | <input type="checkbox"/>           | <input type="checkbox"/> |
| Other meat (pork, beef, lamb) ( <i>not including sausages and cold meat</i> ) | <input type="checkbox"/>   | <input type="checkbox"/> | <input type="checkbox"/>    | <input type="checkbox"/> | <input type="checkbox"/>           | <input type="checkbox"/> |
| Whole grain bread, other whole grain foods ( <i>e.g. muesli</i> )             | <input type="checkbox"/>   | <input type="checkbox"/> | <input type="checkbox"/>    | <input type="checkbox"/> | <input type="checkbox"/>           | <input type="checkbox"/> |
| Fruit                                                                         | <input type="checkbox"/>   | <input type="checkbox"/> | <input type="checkbox"/>    | <input type="checkbox"/> | <input type="checkbox"/>           | <input type="checkbox"/> |

**10. On average, how many hours per week have you been physically active over the last 12 months?**

*In as far possible, please differentiate between light work, physically strenuous work and sporting activities*

*If you were not physically active (i.e. did not participate in sporting activities), please enter a zero.*

Over the last 12 months

**Physically strenuous work**

(e.g. work in the agricultural and construction industries, or as a nurse for the sick or elderly...)

|\_|\_| hours per week (*on average*)

**Physically strenuous sporting activities**

(e.g. football, swimming, skiing, challenging cycling, mountain climbing, jogging ...)

|\_|\_| hours per week (*on average*)

**Light work, conducted at walking speed**

(e.g. housework, garden work, work as salesperson...)

|\_|\_| hours per week (*on average*)

**Easy activities**

(e.g. walking to work / going shopping, going for a walk, cycling...)

|\_|\_| hours per week (*on average*)

**Thank-you for your participation**
