# Supplementary material for: Positive family history of colorectal cancer in a general practice setting [FRIDA.Frankfurt]: study protocol of a of a cross-sectional study
Source: Springer Nature journal article supplement (doi:10.1186/s12885-015-1600-7), 2015-08-27
Supplement: MOESM5 [file 12885_2015_1600_MOESM5_ESM.pdf]

# FR DA.Frankfurt

---

## Familiäres Risiko für Darmkrebs

### Questionnaire 4

(The following boxes were filled out at the trial coordination center)

|                   |  |
|-------------------|--|
| <b>Date</b>       |  |
| <b>Patient-ID</b> |  |

Dear participant,

Thank-you very much for taking the time to answer the following questions. The questionnaire will only take a few minutes to fill in. Please observe the following instructions:

- Please clearly tick the appropriate box. If you make a mistake, cross out the corresponding box and tick the correct one.
- **Please answer every question.** If you are in any doubt, you should tick the box which is most appropriate.
- Your answers will of course be treated in **strict confidence**. Only pseudonymized data will be used in the analysis.

If you have any questions, please do not hesitate to contact us. You will find contact details below. **Thank-you!**

|                                                                                                                                                                                                                                    |                                                                                                                                                                                                                                                     |
|------------------------------------------------------------------------------------------------------------------------------------------------------------------------------------------------------------------------------------|-----------------------------------------------------------------------------------------------------------------------------------------------------------------------------------------------------------------------------------------------------|
| <p><b>1. Following the consultation with your family doctor, did you participate in bowel cancer screening by having an occult blood test?</b></p> <p><input type="checkbox"/> Yes</p> <p><input type="checkbox"/> No</p>          |                                                                                                                                                                                                                                                     |
| <p><b>2. Following the consultation with your family doctor, did you participate in bowel cancer screening by having a colonoscopy?</b></p> <p><input type="checkbox"/> Yes</p> <p><input type="checkbox"/> No</p>                 |                                                                                                                                                                                                                                                     |
| <p><b>Please answer one of the following questions, depending on whether you participated in bowel cancer screening or not</b></p>                                                                                                 |                                                                                                                                                                                                                                                     |
| <div style="text-align: center;"> <p>If you underwent bowel cancer screening</p> </div> <p><b>3a. I regret having undergone bowel cancer screening.</b></p> <p><input type="checkbox"/> Yes</p> <p><input type="checkbox"/> No</p> | <div style="text-align: center;"> <p>If you did <u>not</u> undergo bowel cancer screening</p> </div> <p><b>3b. I regret not having undergone bowel cancer screening.</b></p> <p><input type="checkbox"/> Yes</p> <p><input type="checkbox"/> No</p> |

**Questions about your thoughts and feelings**

| <p><b>4. Over the last two weeks, how often have you been bothered by any of the following problems?</b></p> <p><i>Please tick the appropriate answer with „✓“</i></p> <table style="width: 100%; border-collapse: collapse; margin-top: 10px;"> <thead> <tr> <th style="text-align: left; border-bottom: 1px solid black;">Over the last two weeks</th> <th style="text-align: center; border-bottom: 1px solid black;">Not at all</th> <th style="text-align: center; border-bottom: 1px solid black;">Several days</th> <th style="text-align: center; border-bottom: 1px solid black;">More than half the days</th> <th style="text-align: center; border-bottom: 1px solid black;">Nearly every day</th> </tr> </thead> <tbody> <tr> <td style="border-bottom: 1px solid black;">1. Feeling nervous, anxious or on edge</td> <td style="text-align: center; border-bottom: 1px solid black;">0</td> <td style="text-align: center; border-bottom: 1px solid black;">1</td> <td style="text-align: center; border-bottom: 1px solid black;">2</td> <td style="text-align: center; border-bottom: 1px solid black;">3</td> </tr> <tr> <td style="border-bottom: 1px solid black;">2. Not being able to stop or control worrying</td> <td style="text-align: center; border-bottom: 1px solid black;">0</td> <td style="text-align: center; border-bottom: 1px solid black;">1</td> <td style="text-align: center; border-bottom: 1px solid black;">2</td> <td style="text-align: center; border-bottom: 1px solid black;">3</td> </tr> </tbody> </table> | Over the last two weeks | Not at all   | Several days            | More than half the days | Nearly every day | 1. Feeling nervous, anxious or on edge | 0 | 1 | 2 | 3 | 2. Not being able to stop or control worrying | 0 | 1 | 2 | 3 |
|-------------------------------------------------------------------------------------------------------------------------------------------------------------------------------------------------------------------------------------------------------------------------------------------------------------------------------------------------------------------------------------------------------------------------------------------------------------------------------------------------------------------------------------------------------------------------------------------------------------------------------------------------------------------------------------------------------------------------------------------------------------------------------------------------------------------------------------------------------------------------------------------------------------------------------------------------------------------------------------------------------------------------------------------------------------------------------------------------------------------------------------------------------------------------------------------------------------------------------------------------------------------------------------------------------------------------------------------------------------------------------------------------------------------------------------------------------------------------------------------------------------------------------------------------------------|-------------------------|--------------|-------------------------|-------------------------|------------------|----------------------------------------|---|---|---|---|-----------------------------------------------|---|---|---|---|
| Over the last two weeks                                                                                                                                                                                                                                                                                                                                                                                                                                                                                                                                                                                                                                                                                                                                                                                                                                                                                                                                                                                                                                                                                                                                                                                                                                                                                                                                                                                                                                                                                                                                     | Not at all              | Several days | More than half the days | Nearly every day        |                  |                                        |   |   |   |   |                                               |   |   |   |   |
| 1. Feeling nervous, anxious or on edge                                                                                                                                                                                                                                                                                                                                                                                                                                                                                                                                                                                                                                                                                                                                                                                                                                                                                                                                                                                                                                                                                                                                                                                                                                                                                                                                                                                                                                                                                                                      | 0                       | 1            | 2                       | 3                       |                  |                                        |   |   |   |   |                                               |   |   |   |   |
| 2. Not being able to stop or control worrying                                                                                                                                                                                                                                                                                                                                                                                                                                                                                                                                                                                                                                                                                                                                                                                                                                                                                                                                                                                                                                                                                                                                                                                                                                                                                                                                                                                                                                                                                                               | 0                       | 1            | 2                       | 3                       |                  |                                        |   |   |   |   |                                               |   |   |   |   |

**5. Over the last two weeks, how often have you been bothered by any of the following problems?**

*Please tick the appropriate answer with „✓“*

| Over the last two weeks                                                                                                                                                      | Not at all | Several days | More than half the days | Nearly every day |
|------------------------------------------------------------------------------------------------------------------------------------------------------------------------------|------------|--------------|-------------------------|------------------|
| 1. Little interest or pleasure in doing things                                                                                                                               | 0          | 1            | 2                       | 3                |
| 2. Feeling down, depressed, or hopeless                                                                                                                                      | 0          | 1            | 2                       | 3                |
| 3. Trouble falling or staying asleep, or sleeping too much                                                                                                                   | 0          | 1            | 2                       | 3                |
| 4. Feeling tired or having little energy                                                                                                                                     | 0          | 1            | 2                       | 3                |
| 5. Poor appetite or overeating                                                                                                                                               | 0          | 1            | 2                       | 3                |
| 6. Feeling bad about yourself – or that you are a failure or have let yourself or your family down                                                                           | 0          | 1            | 2                       | 3                |
| 7. Trouble concentrating on things, such as reading the newspaper or watching television                                                                                     | 0          | 1            | 2                       | 3                |
| 8. Moving or speaking so slowly that other people could have noticed? Or the opposite – being so fidgety or restless that you have been moving around a lot more than usual? | 0          | 1            | 2                       | 3                |
| 9. Thoughts that you would be better off dead, or of hurting yourself in some way                                                                                            | 0          | 1            | 2                       | 3                |

## Thank-you for your participation

Sources:

Frage 4: GAD-2: Kroenke K, Spitzer RL, Williams JBW. The PHQ-9. Validity of a brief depression severity measure. J Gen Intern Med 2001; 16: 606–613

Frage 5: PHQ-9:Kroenke K, Spitzer RL, Williams JBW, Monahan PO, Löwe B. Anxiety disorders in primary care: prevalence, impairment, comorbidity, and detection. Ann Intern Med 2007; 146: 317-325
